# Supplementary material for: Comparison of the effects of resveratrol and its derivative pterostilbene on hepatic oxidative stress and mitochondrial dysfunction in piglets challenged with diquat
Source: Royal Society of Chemistry journal article supplement (doi:10.1039/d0fo00732c), 2020-01-01
Supplement: d0fo00732c2.pdf [file d0fo00732c2.pdf]

- 1 **Supplementary Table 1.** Composition and nutrient levels of the diet (% , as-fed basis  
2 unless otherwise stated)

| Items                        | Contents |
|------------------------------|----------|
| Maize                        | 62.78    |
| Soybean meal                 | 15.00    |
| Fermented soybean meal       | 7.00     |
| Extruded soybean             | 7.00     |
| Soy protein isolate          | 1.30     |
| Soyabean oil                 | 2.00     |
| CaHPO <sub>4</sub>           | 1.80     |
| Limestone                    | 0.80     |
| Salt                         | 0.35     |
| L-lysine-HCl, 78%            | 0.52     |
| L-methionine                 | 0.13     |
| L-threonine                  | 0.15     |
| L-isoleucine                 | 0.10     |
| L-tryptophan                 | 0.01     |
| L-histidine                  | 0.01     |
| Calcium propionate, 50%      | 0.05     |
| Premix <sup>a</sup>          | 1.00     |
| Total                        | 100.00   |
| Nutrient levels <sup>b</sup> |          |

|                               |       |
|-------------------------------|-------|
| Digestible energy, Mcal/kg    | 3.47  |
| Metabolizable energy, Mcal/kg | 3.30  |
| Crude protein                 | 20.36 |
| Total lysine                  | 1.51  |
| Total methionine              | 0.46  |
| Total methionine + cystine    | 0.86  |
| Total threonine               | 0.94  |
| Total tryptophan              | 0.40  |
| Total histidine               | 0.77  |
| Total isoleucine              | 0.79  |
| Total valine                  | 1.20  |
| Total calcium                 | 0.82  |
| Total phosphorus              | 0.65  |

---

3 <sup>a</sup>Provide the following per kg complete diet: Vitamin A, 8,000 IU; Vitamin D<sub>3</sub>, 3,000  
4 IU; Vitamin E, 20 IU; Vitamin K<sub>3</sub>, 3 mg; Vitamin B<sub>1</sub>, 2 mg; Vitamin B<sub>2</sub>, 5 mg;  
5 Vitamin B<sub>6</sub>, 7 mg; Vitamin B<sub>12</sub>, 0.02 mg; Niacin, 30 mg; Pantothenic acid, 15 mg;  
6 Folic acid, 0.3 mg; Biotin, 0.08 mg; Choline chloride, 500 mg; Fe (from ferrous  
7 sulfate), 110 mg; Cu (from copper sulfate), 7 mg; Mn (from manganese sulfate), 5  
8 mg; Zn (from zinc sulfate), 110 mg; I (from calcium iodate), 0.3 mg; Se (from sodium  
9 selenite), 0.3 mg.

10 <sup>b</sup>All nutrient levels were analyzed values, except digestible energy and metabolizable  
11 energy.
